# Supplementary material
Source: MDPI journal article supplement (https://www.mdpi.com/2072-4292/10/4/512)
Supplement: s1 [file s1]

*Article*

**Focal Mechanisms of the 2016 Central Italy Earthquake Sequence Inferred from High-Rate GPS and Broadband Seismic Waveforms**

**
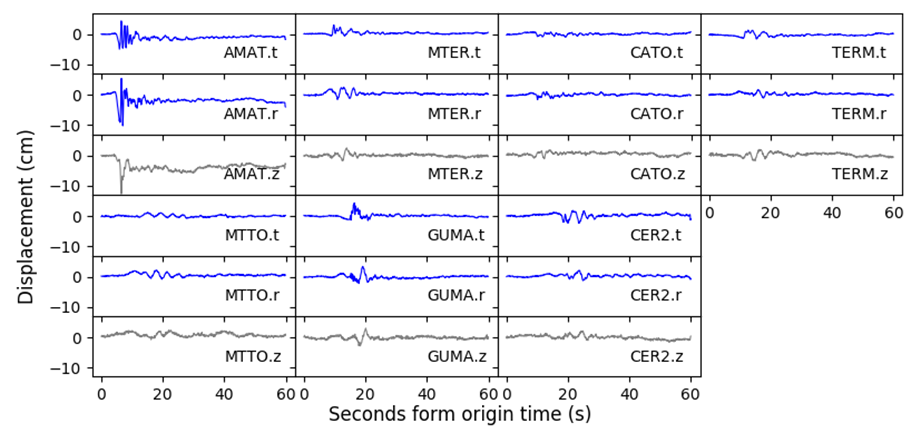
Shuhan Zhong 1,2, Caijun Xu 1,2,3,*, Lei Yi 1,2 and Yanyan Li 1,2,4**

**Figure S1.** Transverse, radial and vertical components of GPS displacement time series obtained in the Amatrice earthquake. Waveforms used in the inversion are plotted in blue.


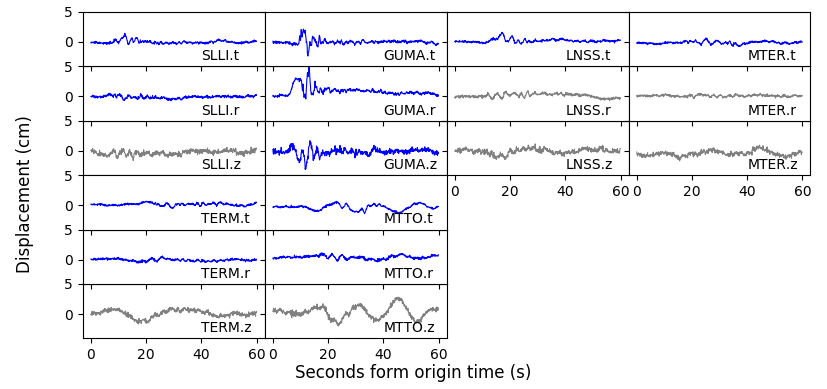


**Figure S2.** Transverse, radial and vertical components of GPS displacement time series obtained in the Visso earthquake. Waveforms used in the inversion are plotted in blue.


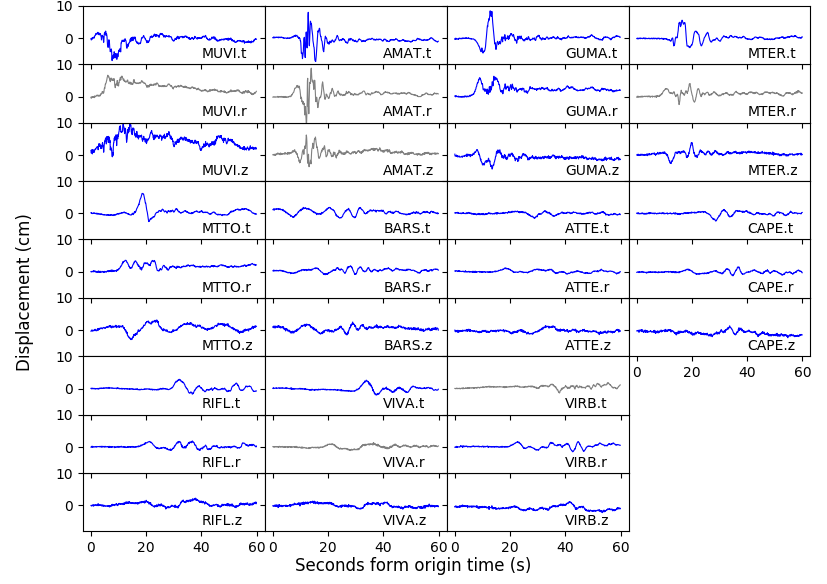


**Figure S3.** Transverse, radial and vertical components of GPS displacement time series obtained in the Norcia earthquake. Waveforms used in the inversion are plotted in blue.


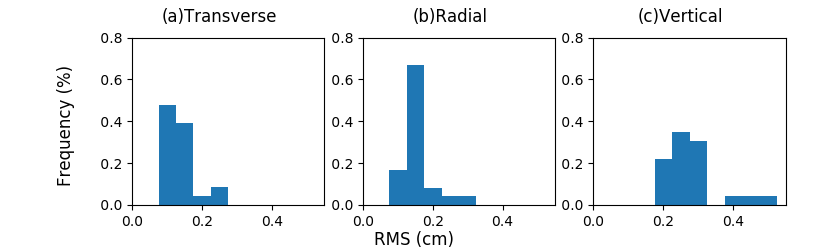


**Figure S4.** RMS histogram distributions on three components calculated in a 10 s time window before the earthquake origin time for all the used GPS data.

© 2018 by the authors. Submitted for possible open access publication under the
terms and conditions of the Creative Commons Attribution (CC BY) license (http://creativecommons.org/licenses/by/4.0/).
